# Supplementary material for: Rugby-Specific Small-Sided Games Training Is an Effective Alternative to Stationary Cycling at Reducing Clinical Risk Factors Associated with the Development of Type 2 Diabetes: A Randomized, Controlled Trial
Source: PubMed Central journal article supplement (PMC4452519; doi:10.1371/journal.pone.0127548), 2015-06-01
Supplement: pone.0127548.s004.pdf [file pone.0127548.s004.pdf]

| Football   |      |            | Cycling |      |            | Control |      |            |
|------------|------|------------|---------|------|------------|---------|------|------------|
| Subject    | Age  | Height (m) | Subject | Age  | Height (m) | Subject | Age  | Height (m) |
|            |      |            | 11      | 49.0 | 1.8        | 22      | 53.0 | 1.8        |
|            |      |            | 12      | 49.0 | 1.7        | 23      | 54.0 | 1.8        |
|            |      |            | 13      | 39.0 | 1.8        | 24      | 55.0 | 1.7        |
|            |      |            | 14      | 48.0 | 1.8        | 25      | 52.0 | 1.8        |
|            |      |            | 15      | 61.0 | 1.7        | 26      | 34.0 | 1.8        |
|            |      |            | 16      | 45.0 | 1.8        | 27      | 45.0 | 1.8        |
|            |      |            | 17      | 43.0 | 1.8        | 28      | 40.0 | 1.7        |
|            |      |            | 18      | 51.0 | 1.695      | 29      | 57.0 | 1.8        |
|            |      |            | 19      | 56.0 | 1.79       | 30      | 47.0 | 1.78       |
|            |      |            | 20      | 46.0 | 1.79       | 31      | 52.0 | 1.9        |
|            |      |            | 21      | 58.0 | 1.765      | 32      | 52.0 | 1.775      |
| <i>M</i>   | 46.8 | 1.76       |         | 49.5 | 1.76       |         | 49.2 | 1.8        |
| <i>SD</i>  | 6.60 | 0.08       |         | 6.61 | 0.04       |         | 7.03 | 0.06       |
| <i>SEM</i> | 2.09 | 0.02       |         | 1.99 | 0.01       |         | 2.12 | 0.02       |

| Mass (kg)  |      |      | Cycling |       |       | Control |       |        |
|------------|------|------|---------|-------|-------|---------|-------|--------|
| Subject    | Pre  | Post | Subject | Pre   | Post  | Subject | Pre   | Post   |
|            |      |      | 11      | 82.24 | 82.24 | 22      | 101.9 | 101.28 |
|            |      |      | 12      | 91.18 | 91.76 | 23      | 84.24 | 84.42  |
|            |      |      | 13      | 97.3  | 95.9  | 24      | 67.8  | 68.7   |
|            |      |      | 14      | 116.5 | 116.3 | 25      | 84.6  | 85.9   |
|            |      |      | 15      | 93.6  | 92.9  | 26      | 95.7  | 98.6   |
|            |      |      | 16      | 95.6  | 95.9  | 27      | 92.4  | 91.6   |
|            |      |      | 17      | 96.4  | 97.1  | 28      | 89.6  | 89.5   |
|            |      |      | 18      | 71.3  | 69.9  | 29      | 108.4 | 108.8  |
|            |      |      | 19      | 75.8  | 75.2  | 30      | 99.4  | 96.4   |
|            |      |      | 20      | 91.5  | 90.63 | 31      | 91.42 | 92.24  |
|            |      |      | 21      | 81.6  | 80.32 | 32      | 103.1 | 103.08 |
| <i>M</i>   | 86.3 | 86.1 |         | 90.3  | 89.8  |         | 92.6  | 92.8   |
| <i>SD</i>  | 13.6 | 13.4 |         | 12.3  | 12.6  |         | 11.2  | 10.9   |
| <i>SEM</i> | 4.3  | 4.2  |         | 3.7   | 3.8   |         | 3.4   | 3.3    |

| BMI        |       |       | Cycling |       |       | Control |       |       |
|------------|-------|-------|---------|-------|-------|---------|-------|-------|
| Subject    | Pre   | Post  | Subject | Pre   | Post  | Subject | Pre   | Post  |
|            |       |       | 11      | 26.07 | 26.07 | 22      | 33.27 | 33.07 |
|            |       |       | 12      | 32.11 | 32.32 | 23      | 27.04 | 27.10 |
|            |       |       | 13      | 28.75 | 28.33 | 24      | 24.91 | 25.23 |
|            |       |       | 14      | 36.60 | 36.55 | 25      | 26.10 | 26.51 |
|            |       |       | 15      | 31.05 | 30.82 | 26      | 30.20 | 31.11 |
|            |       |       | 16      | 31.05 | 31.15 | 27      | 29.31 | 29.06 |
|            |       |       | 17      | 30.76 | 30.99 | 28      | 29.59 | 29.55 |
|            |       |       | 18      | 24.81 | 24.34 | 29      | 33.46 | 33.59 |
|            |       |       | 19      | 23.66 | 23.48 | 30      | 31.37 | 30.42 |
|            |       |       | 20      | 28.55 | 28.29 | 31      | 25.06 | 25.28 |
|            |       |       | 21      | 26.21 | 25.78 | 32      | 32.72 | 32.72 |
| <i>M</i>   | 27.62 | 27.57 |         | 29.06 | 28.92 |         | 29.47 | 29.42 |
| <i>SD</i>  | 2.89  | 2.90  |         | 3.76  | 3.90  |         | 3.20  | 3.07  |
| <i>SEM</i> | 0.92  | 0.92  |         | 1.13  | 1.17  |         | 0.97  | 0.92  |

| W/G (cm)   |       |       | Cycling |        |        | Control |        |        |
|------------|-------|-------|---------|--------|--------|---------|--------|--------|
| Football   |       |       | Cycling |        |        | Control |        |        |
| Subject    | Pre   | Post  | Subject | Pre    | Post   | Subject | Pre    | Post   |
| 1          | 93.5  | 93.5  | 11      | 88.5   | 87     | 22      | 100    | 100    |
| 2          | 98    | 98    | 12      | 108.5  | 105.5  | 23      | 89     | 89     |
| 3          | 98.5  | 86    | 13      | 104    | 104.5  | 24      | 84     | 84.5   |
| 4          | 88    | 86    | 14      | 113    | 111    | 25      | 89     | 90     |
| 5          | 93    | 85.5  | 15      | 98     | 98     | 26      | 102.5  | 102    |
| 6          | 92    | 89    | 16      | 95     | 94     | 27      | 103    | 96     |
| 7          | 82    | 82    | 17      | 95     | 101    | 28      | 102    | 100.5  |
| 8          | 98.5  | 97    | 18      | 84     | 81.5   | 29      | 112    | 112    |
| 9          | 100   | 99    | 19      | 92     | 87     | 30      | 106    | 107    |
| 10         | 105   | 105   | 20      | 95.5   | 92     | 31      | 95     | 95     |
|            |       |       | 21      | 93     | 90     | 32      | 107    | 107    |
|            | 0.064 |       |         | 0.151  |        |         | 0.401  |        |
| <i>M</i>   | 94.85 | 92.10 |         | 96.95  | 95.59  |         | 99.05  | 98.45  |
| <i>SD</i>  | 6.60  | 7.49  |         | 8.55   | 9.18   |         | 8.72   | 8.50   |
| <i>SEM</i> | 2.09  | 2.37  |         | 2.58   | 2.77   |         | 2.63   | 2.56   |
| H/G (cm)   |       |       | Cycling |        |        | Control |        |        |
| Football   |       |       | Cycling |        |        | Control |        |        |
| Subject    | Pre   | Post  | Subject | Pre    | Post   | Subject | Pre    | Post   |
| 1          | 105   | 104.5 | 11      | 96     | 96     | 22      | 108    | 108    |
| 2          | 100   | 98    | 12      | 101    | 98     | 23      | 98.5   | 99.5   |
| 3          | 89.5  | 88.5  | 13      | 103    | 103    | 24      | 94     | 94.5   |
| 4          | 99    | 97    | 14      | 107.5  | 103.5  | 25      | 92     | 92     |
| 5          | 96    | 93    | 15      | 106    | 106    | 26      | 104.5  | 104    |
| 6          | 95    | 95    | 16      | 110    | 107    | 27      | 101    | 100    |
| 7          | 92.5  | 92.5  | 17      | 102    | 100    | 28      | 103.5  | 103.5  |
| 8          | 105.5 | 103.5 | 18      | 94     | 92     | 29      | 112    | 112    |
| 9          | 106   | 103   | 19      | 97     | 96     | 30      | 107    | 108    |
| 10         | 109.5 | 108   | 20      | 100    | 99     | 31      | 103    | 103    |
|            |       |       | 21      | 100    | 100    | 32      | 112    | 112    |
| <i>M</i>   | 99.80 | 98.30 |         | 101.50 | 100.05 |         | 103.23 | 103.32 |
| <i>SD</i>  | 6.58  | 6.25  |         | 4.92   | 4.55   |         | 6.57   | 6.53   |
| <i>SEM</i> | 2.08  | 1.98  |         | 1.48   | 1.37   |         | 1.98   | 1.97   |
| WHR        |       |       | Cycling |        |        | Control |        |        |
| Football   |       |       | Cycling |        |        | Control |        |        |
| Subject    | Pre   | Post  | Subject | Pre    | Post   | Subject | Pre    | Post   |
| 1          | 0.89  | 0.89  | 11      | 0.92   | 0.91   | 22      | 0.93   | 0.93   |
| 2          | 0.98  | 1.00  | 12      | 1.07   | 1.08   | 23      | 0.90   | 0.89   |
| 3          | 1.10  | 0.97  | 13      | 1.01   | 1.01   | 24      | 0.89   | 0.89   |
| 4          | 0.89  | 0.89  | 14      | 1.05   | 1.07   | 25      | 0.97   | 0.98   |
| 5          | 0.97  | 0.92  | 15      | 0.92   | 0.92   | 26      | 0.98   | 0.98   |
| 6          | 0.97  | 0.94  | 16      | 0.86   | 0.88   | 27      | 1.02   | 0.96   |
| 7          | 0.89  | 0.89  | 17      | 0.93   | 1.01   | 28      | 0.99   | 0.97   |
| 8          | 0.93  | 0.94  | 18      | 0.89   | 0.89   | 29      | 1.00   | 1.00   |
| 9          | 0.94  | 0.96  | 19      | 0.95   | 0.91   | 30      | 0.99   | 0.99   |
| 10         | 0.96  | 0.97  | 20      | 0.96   | 0.93   | 31      | 0.92   | 0.92   |
|            |       |       | 21      | 0.93   | 0.90   | 32      | 0.96   | 0.96   |
| <i>M</i>   | 0.95  | 0.94  |         | 0.95   | 0.95   |         | 0.96   | 0.95   |
| <i>SD</i>  | 0.06  | 0.04  |         | 0.06   | 0.07   |         | 0.04   | 0.04   |
| <i>SEM</i> | 0.02  | 0.01  |         | 0.02   | 0.02   |         | 0.01   | 0.01   |

| Total Chol |     |      |         |     |      |         |     |      |
|------------|-----|------|---------|-----|------|---------|-----|------|
| Football   |     |      | Cycling |     |      | Control |     |      |
| Subject    | PRE | POST | Subject | PRE | POST | Subject | PRE | POST |
| 1.0        | 4.9 | 4.9  | 11      | 5.0 | 4.0  | 22      | 4.5 | 5.2  |
| 2.0        | 6.0 | 5.8  | 12      | 4.8 | 5.2  | 23      | 4.8 | 4.6  |
| 3.0        | 4.6 | 4.1  | 13      | 5.7 | 6.0  | 24      | 5.4 | 6.2  |
| 4.0        | 5.6 | 4.5  | 14      | 6.2 | 5.7  | 25      | 5.2 | 4.6  |
| 5.0        | 4.4 | 4.3  | 15      | 4.8 | 5.0  | 26      | 5.8 | 5.0  |
| 6.0        | 7.3 | 6.6  | 16      | 6.2 | 5.6  | 27      | 4.0 | 4.2  |
| 7.0        | 5.5 | 5.4  | 17      | 4.3 | 4.6  | 28      | 3.1 | 3.9  |
| 8.0        | 4.9 | 5.2  | 18      | 4.0 | 4.3  | 29      | 5.2 | 5.2  |
| 9.0        | 6.7 | 6.6  | 19      | 6.4 | 6.4  | 30      | 5.5 | 5.2  |
| 10.0       | 4.4 | 4.7  | 20      | 5.9 | 5.5  | 31      | 5.7 | 5.4  |
|            |     |      | 21      | 5.1 | 4.2  | 32      | 6.8 | 6.2  |
| <i>M</i>   | 5.4 | 5.2  |         | 5.3 | 5.1  |         | 5.1 | 5.1  |
| <i>SD</i>  | 1.0 | 0.9  |         | 0.8 | 0.8  |         | 1.0 | 0.7  |
| <i>SEM</i> | 0.3 | 0.3  |         | 0.2 | 0.2  |         | 0.3 | 0.2  |

  

| LDL        |     |      |         |     |      |         |     |      |
|------------|-----|------|---------|-----|------|---------|-----|------|
| Football   |     |      | Cycling |     |      | Control |     |      |
| Subject    | PRE | POST | Subject | PRE | POST | Subject | PRE | POST |
| 1.0        | 3.2 | 3.1  | 11      | 3.3 | 2.3  | 22      | 2.7 | 3.7  |
| 2.0        | 3.6 | 3.7  | 12      | 3.0 | 3.2  | 23      | 2.8 | 2.5  |
| 3.0        | 2.8 | 2.3  | 13      | 3.6 | 4.2  | 24      | 4.1 | 3.4  |
| 4.0        | 3.8 | 2.8  | 14      | 3.9 | 3.7  | 25      | 2.8 | 2.5  |
| 5.0        | 2.6 | 2.4  | 15      | 3.4 | 3.2  | 26      | 4.0 | 3.3  |
| 6.0        | 5.2 | 4.2  | 16      | 4.4 | 3.8  | 27      | 2.5 | 2.7  |
| 7.0        | 4.0 | 3.8  | 17      | 2.1 | 2.2  | 28      | 2.1 | 2.4  |
| 8.0        | 3.3 | 3.5  | 18      | 2.4 | 2.5  | 29      | 3.5 | 3.4  |
| 9.0        | 5.1 | 4.7  | 19      | 4.2 | 4.1  | 30      | 3.2 | 3.8  |
| 10.0       | 2.2 | 2.4  | 20      | 4.3 | 3.8  | 31      | 3.7 | 3.6  |
|            |     |      | 21      | 3.3 | 2.5  | 32      | 4.8 | 4.1  |
| <i>M</i>   | 3.6 | 3.3  |         | 3.4 | 3.2  |         | 3.3 | 3.2  |
| <i>SD</i>  | 1.0 | 0.8  |         | 0.7 | 0.7  |         | 0.8 | 0.6  |
| <i>SEM</i> | 0.3 | 0.3  |         | 0.2 | 0.2  |         | 0.2 | 0.2  |

  

| HDL        |     |      |         |     |      |         |     |      |
|------------|-----|------|---------|-----|------|---------|-----|------|
| Football   |     |      | Cycling |     |      | Control |     |      |
| Subject    | PRE | POST | Subject | PRE | POST | Subject | PRE | POST |
| 1.0        | 1.2 | 1.3  | 11      | 1.2 | 1.2  | 22      | 0.8 | 0.8  |
| 2.0        | 1.0 | 1.1  | 12      | 1.3 | 1.5  | 23      | 1.7 | 1.8  |
| 3.0        | 1.2 | 1.1  | 13      | 1.2 | 1.2  | 24      | 1.7 | 1.7  |
| 4.0        | 1.5 | 1.3  | 14      | 1.0 | 0.8  | 25      | 2.0 | 1.5  |
| 5.0        | 1.4 | 1.5  | 15      | 1.0 | 1.0  | 26      | 1.3 | 1.3  |
| 6.0        | 1.0 | 1.0  | 16      | 1.3 | 1.3  | 27      | 1.1 | 1.2  |
| 7.0        | 1.0 | 1.1  | 17      | 1.7 | 1.9  | 28      | 0.8 | 0.7  |
| 8.0        | 1.1 | 1.2  | 18      | 1.5 | 1.6  | 29      | 1.1 | 1.1  |
| 9.0        | 1.0 | 1.0  | 19      | 1.6 | 1.5  | 30      | 1.0 | 1.0  |
| 10.0       | 1.6 | 1.8  | 20      | 1.2 | 1.2  | 31      | 1.6 | 1.3  |
|            |     |      | 21      | 1.2 | 1.3  | 32      | 1.5 | 1.4  |
| <i>M</i>   | 1.2 | 1.2  |         | 1.3 | 1.3  |         | 1.3 | 1.2  |
| <i>SD</i>  | 0.2 | 0.3  |         | 0.2 | 0.3  |         | 0.4 | 0.4  |
| <i>SEM</i> | 0.1 | 0.1  |         | 0.1 | 0.1  |         | 0.1 | 0.1  |

| TRIGS        |     |      |         |     |      |         |     |      |  |
|--------------|-----|------|---------|-----|------|---------|-----|------|--|
| Football     |     |      | Cycling |     |      | Control |     |      |  |
| Subject      | PRE | POST | Subject | PRE | POST | Subject | PRE | POST |  |
|              |     |      | 11      | 1.1 | 1.2  | 22      | 1.6 | 2.3  |  |
| 1.0          | 1.0 | 1.2  | 12      | 1.3 | 1.1  | 23      | 0.8 | 0.8  |  |
| 2.0          | 3.1 | 2.1  | 13      | 1.9 | 1.4  | 24      | 0.7 | 0.6  |  |
| 3.0          | 1.3 | 1.6  | 14      | 2.8 | 2.5  | 25      | 0.8 | 1.3  |  |
| 4.0          | 0.8 | 0.7  | 15      | 1.0 | 1.8  | 26      | 1.0 | 0.9  |  |
| 5.0          | 1.0 | 1.0  | 16      | 1.0 | 1.0  | 27      | 0.8 | 0.6  |  |
| 6.0          | 2.3 | 3.0  | 17      | 1.1 | 1.1  | 28      | 0.5 | 2.0  |  |
| 7.0          | 1.0 | 1.0  | 18      | 0.3 | 0.4  | 29      | 1.3 | 1.5  |  |
| 8.0          | 1.2 | 1.1  | 19      | 1.4 | 1.9  | 30      | 2.9 | 1.1  |  |
| 9.0          | 1.3 | 2.0  | 20      | 1.1 | 1.0  | 31      | 1.0 | 1.2  |  |
| 10.0         | 1.5 | 1.1  | 21      | 1.3 | 0.9  | 32      | 1.3 | 1.5  |  |
| <i>M</i>     | 1.4 | 1.5  |         | 1.3 | 1.3  |         | 1.1 | 1.3  |  |
| <i>SD</i>    | 0.7 | 0.7  |         | 0.6 | 0.6  |         | 0.7 | 0.5  |  |
| <i>SEM</i>   | 0.2 | 0.2  |         | 0.2 | 0.2  |         | 0.2 | 0.2  |  |
| Hazard Ratio |     |      |         |     |      |         |     |      |  |
| Football     |     |      | Cycling |     |      | Control |     |      |  |
| Subject      | PRE | POST | Subject | PRE | POST | Subject | PRE | POST |  |
|              |     |      | 11      | 4.2 | 3.5  | 22      | 6.2 | 5.8  |  |
| 1.0          | 3.9 | 3.9  | 12      | 3.8 | 3.6  | 23      | 2.9 | 2.6  |  |
| 2.0          | 5.9 | 5.3  | 13      | 4.7 | 5.0  | 24      | 3.2 | 3.6  |  |
| 3.0          | 3.9 | 3.8  | 14      | 6.5 | 7.0  | 25      | 2.6 | 3.1  |  |
| 4.0          | 3.8 | 3.3  | 15      | 4.7 | 4.9  | 26      | 4.4 | 4.0  |  |
| 5.0          | 3.3 | 2.9  | 16      | 4.8 | 4.2  | 27      | 3.6 | 3.6  |  |
| 6.0          | 7.0 | 6.8  | 17      | 2.6 | 2.5  | 28      | 4.0 | 6.0  |  |
| 7.0          | 5.5 | 5.0  | 18      | 2.7 | 2.6  | 29      | 4.7 | 5.0  |  |
| 8.0          | 4.5 | 4.4  | 19      | 4.0 | 4.3  | 30      | 5.8 | 5.3  |  |
| 9.0          | 6.5 | 6.8  | 20      | 5.1 | 4.4  | 31      | 3.6 | 4.2  |  |
| 10.0         | 2.8 | 2.6  | 21      | 4.2 | 3.2  | 32      | 4.7 | 4.4  |  |
| <i>M</i>     | 4.7 | 4.5  |         | 4.3 | 4.2  |         | 3.9 | 4.2  |  |
| <i>SD</i>    | 1.4 | 1.5  |         | 1.1 | 1.3  |         | 1.0 | 1.1  |  |
| <i>SEM</i>   | 0.5 | 0.5  |         | 0.3 | 0.4  |         | 0.3 | 0.3  |  |
| Glucose      |     |      |         |     |      |         |     |      |  |
| Football     |     |      | Cycling |     |      | Control |     |      |  |
| Subject      | PRE | POST | Subject | PRE | POST | Subject | PRE | POST |  |
|              |     |      | 11      | 5.2 | 4.1  | 22      | 2.9 | 3.7  |  |
| 1.0          | 3.8 | 4.5  | 12      | 5.0 | 5.4  | 23      | 4.7 | 5.2  |  |
| 2.0          | 5.4 | 4.3  | 13      | 5.3 | 5.1  | 24      | 3.8 | 4.0  |  |
| 3.0          | 5.5 | 5.0  | 14      | 4.7 | 4.8  | 25      | 4.8 | 5.4  |  |
| 4.0          | 3.7 | 3.7  | 15      | 6.4 | 6.1  | 26      | 6.2 | 6.0  |  |
| 5.0          | 4.3 | 3.3  | 16      | 4.6 | 4.4  | 27      | 5.5 | 4.2  |  |
| 6.0          | 5.0 | 4.9  | 17      | 5.3 | 5.3  | 28      | 4.7 | 3.9  |  |
| 7.0          | 4.4 | 4.1  | 18      | 3.7 | 4.2  | 29      | 5.2 | 5.8  |  |
| 8.0          | 4.9 | 4.8  | 19      | 3.9 | 4.0  | 30      | 4.4 | 4.1  |  |
| 9.0          | 4.7 | 4.6  | 20      | 4.6 | 3.9  | 31      | 5.4 | 5.2  |  |
| 10.0         | 5.3 | 4.8  | 21      | 4.2 | 4.7  | 32      | 5.2 | 5.3  |  |
| <i>M</i>     | 4.7 | 4.4  |         | 4.8 | 4.7  |         | 4.8 | 4.8  |  |
| <i>SD</i>    | 0.6 | 0.6  |         | 0.7 | 0.7  |         | 0.9 | 0.8  |  |
| <i>SEM</i>   | 0.2 | 0.2  |         | 0.2 | 0.2  |         | 0.3 | 0.3  |  |

| Insulin    |      |      |  | Cycling |      |      |  | Control |      |      |  |
|------------|------|------|--|---------|------|------|--|---------|------|------|--|
| Football   |      |      |  | Cycling |      |      |  | Control |      |      |  |
| Subject    | PRE  | POST |  | Subject | PRE  | POST |  | Subject | PRE  | POST |  |
|            |      |      |  | 11      | 2.9  | 2.0  |  | 22      | 5.6  | 6.0  |  |
| 1.0        | 4.5  | 4.1  |  | 12      | 9.1  | 11.3 |  | 23      | 2.0  | 2.0  |  |
| 2.0        | 25.6 | 12.5 |  | 13      | 9.6  | 7.6  |  | 24      | 2.0  | 2.1  |  |
| 3.0        | 5.7  | 3.5  |  | 14      | 25.3 | 20.2 |  | 25      | 2.0  | 4.8  |  |
| 4.0        | 2.0  | 2.0  |  | 15      | 21.7 | 21.1 |  | 26      | 17.1 | 21.3 |  |
| 5.0        | 3.2  | 3.4  |  | 16      | 8.8  | 9.4  |  | 27      | 12.7 | 8.7  |  |
| 6.0        | 5.0  | 3.4  |  | 17      | 7.7  | 5.8  |  | 28      | 14.2 | 16.9 |  |
| 7.0        | 4.8  | 3.3  |  | 18      | 2.0  | 2.0  |  | 29      | 19.8 | 27.3 |  |
| 8.0        | 4.0  | 12.1 |  | 19      | 2.2  | 2.0  |  | 30      | 11.3 | 9.3  |  |
| 9.0        | 11.1 | 5.2  |  | 20      | 2.0  | 2.0  |  | 31      | 2.0  | 4.0  |  |
| 10.0       | 9.2  | 4.1  |  | 21      | 2.3  | 2.1  |  | 32      | 8.0  | 8.4  |  |
| <i>M</i>   | 7.5  | 5.3  |  |         | 8.5  | 7.8  |  |         | 8.8  | 10.1 |  |
| <i>SD</i>  | 6.9  | 3.8  |  |         | 8.1  | 7.2  |  |         | 6.6  | 8.3  |  |
| <i>SEM</i> | 2.2  | 1.2  |  |         | 2.4  | 2.2  |  |         | 2.0  | 2.5  |  |
| HbA1c      |      |      |  | Cycling |      |      |  | Control |      |      |  |
| Football   |      |      |  | Cycling |      |      |  | Control |      |      |  |
| Subject    | PRE  | POST |  | Subject | PRE  | POST |  | Subject | PRE  | POST |  |
|            |      |      |  | 11      | 5.2  | 5.0  |  | 22      | 5.3  | 5.3  |  |
| 1.0        | 5.9  | 5.5  |  | 12      | 6.3  | 6.0  |  | 23      | 6.1  | 6.0  |  |
| 2.0        | 6.2  | 5.7  |  | 13      | 5.8  | 5.6  |  | 24      | 5.6  | 5.2  |  |
| 3.0        | 6.5  | 6.1  |  | 14      | 5.3  | 5.1  |  | 25      | 5.8  | 5.6  |  |
| 4.0        | 5.4  | 5.4  |  | 15      | 7.4  | 6.3  |  | 26      | 6.2  | 6.0  |  |
| 5.0        | 5.1  | 4.9  |  | 16      | 5.3  | 5.3  |  | 27      | 5.5  | 5.5  |  |
| 6.0        | 5.8  | 5.6  |  | 17      | 5.5  | 5.5  |  | 28      | 5.5  | 5.6  |  |
| 7.0        | 5.9  | 5.5  |  | 18      | 5.4  | 5.2  |  | 29      | 5.3  | 5.8  |  |
| 8.0        | 5.2  | 5.0  |  | 19      | 5.7  | 5.6  |  | 30      | 4.8  | 4.7  |  |
| 9.0        | 5.6  | 5.3  |  | 20      | 5.0  | 4.8  |  | 31      | 5.5  | 5.6  |  |
| 10.0       | 5.4  | 5.3  |  | 21      | 5.4  | 5.1  |  | 32      | 5.3  | 5.4  |  |
| <i>M</i>   | 5.7  | 5.4  |  |         | 5.7  | 5.4  |  |         | 5.5  | 5.5  |  |
| <i>SD</i>  | 0.4  | 0.3  |  |         | 0.7  | 0.4  |  |         | 0.4  | 0.4  |  |
| <i>SEM</i> | 0.1  | 0.1  |  |         | 0.2  | 0.1  |  |         | 0.1  | 0.1  |  |
| HOMA-IS    |      |      |  | Cycling |      |      |  | Control |      |      |  |
| Football   |      |      |  | Cycling |      |      |  | Control |      |      |  |
| Subject    | PRE  | POST |  | Subject | PRE  | POST |  | Subject | PRE  | POST |  |
|            |      |      |  | 11      | 0.7  | 0.4  |  | 22      | 0.7  | 1.0  |  |
| 1.0        | 0.8  | 0.8  |  | 12      | 2.0  | 2.7  |  | 23      | 0.4  | 0.5  |  |
| 2.0        | 6.1  | 2.4  |  | 13      | 2.3  | 1.7  |  | 24      | 0.3  | 0.4  |  |
| 3.0        | 1.4  | 0.8  |  | 14      | 5.2  | 4.3  |  | 25      | 0.4  | 1.1  |  |
| 4.0        | 0.3  | 0.3  |  | 15      | 6.1  | 5.7  |  | 26      | 4.7  | 5.7  |  |
| 5.0        | 0.6  | 0.5  |  | 16      | 1.8  | 1.8  |  | 27      | 3.1  | 1.6  |  |
| 6.0        | 1.1  | 0.7  |  | 17      | 1.8  | 1.4  |  | 28      | 3.0  | 2.9  |  |
| 7.0        | 0.9  | 0.6  |  | 18      | 0.3  | 0.4  |  | 29      | 4.5  | 7.0  |  |
| 8.0        | 0.9  | 2.6  |  | 19      | 0.4  | 0.4  |  | 30      | 2.2  | 1.7  |  |
| 9.0        | 2.3  | 1.1  |  | 20      | 0.4  | 0.3  |  | 31      | 0.5  | 0.9  |  |
| 10.0       | 2.2  | 0.9  |  | 21      | 0.4  | 0.4  |  | 32      | 1.9  | 2.0  |  |
| <i>M</i>   | 1.7  | 1.1  |  |         | 1.9  | 1.8  |  |         | 2.0  | 2.3  |  |
| <i>SD</i>  | 1.7  | 0.8  |  |         | 2.0  | 1.8  |  |         | 1.7  | 2.2  |  |
| <i>SEM</i> | 0.5  | 0.2  |  |         | 0.6  | 0.5  |  |         | 0.5  | 0.7  |  |

| Pre-Training        |           |           |           |                  | Post-Training        |           |           |           |                  |
|---------------------|-----------|-----------|-----------|------------------|----------------------|-----------|-----------|-----------|------------------|
| <b>Football</b>     |           |           |           |                  | <b>Football</b>      |           |           |           |                  |
| Subjects            | TB-LM (g) | TB-FM (g) | TB-FM (%) | Abdominal FM (g) | Subjects             | TB-LM (g) | TB-FM (g) | TB-FM (%) | Abdominal FM (g) |
| 1                   | 68213     | 26402     | 26.9      | 2474             | 1                    | 69188     | 25628     | 26.05     | 2479             |
| 2                   | 54776     | 23359     | 28.7      | 2748             | 2                    | 53957     | 22789     | 28.49     | 2642             |
| 3                   | 51853     | 15126     | 21.6      | 2109             | 3                    | 54066     | 14524     | 20.29     | 1919             |
| 4                   | 55237     | 21886     | 26.9      | 1498             | 4                    | 56586     | 20342     | 25.10     | 1468             |
| 5                   | 51462     | 19641     | 26.3      | 1854             | 5                    | 54975     | 17064     | 22.60     | 1625             |
| 6                   | 59450     | 21367     | 25.3      | 2527             | 6                    | 59553     | 21799     | 25.68     | 2493             |
| 7                   | 48323     | 17563     | 25.5      | 1542             | 7                    | 49131     | 17953     | 25.62     | 1649             |
| 8                   | 70259     | 30318     | 29.0      | 2776             | 8                    | 70586     | 29400     | 28.30     | 2804             |
| 9                   | 65746     | 27752     | 28.6      | 2946             | 9                    | 67569     | 26867     | 27.39     | 2994             |
| 10                  | 67385     | 34877     | 32.8      | 3953             | 10                   | 68221     | 34339     | 32.24     | 3849             |
| <i>Mean</i>         | 59270     | 23829     | 27.2      | 2443             |                      | 60383     | 23071     | 26.18     | 2392             |
| <i>SD</i>           | 8034      | 6044      | 2.9       | 738              |                      | 7795      | 6078      | 3.29      | 742              |
| <i>SEM</i>          | 2540.416  | 1911.304  | 0.931     | 233.532          |                      | 2465.000  | 1921.938  | 1.040     | 234.594          |
| <b>Cycling</b>      |           |           |           |                  | <b>Cycling</b>       |           |           |           |                  |
| Subjects            | TB-LM (g) | TB-FM (g) | TB-FM (%) | Abdominal FM (g) | Subjects             | TB-LM (g) | TB-FM (g) | TB-FM (%) | Abdominal FM (g) |
| 11                  | 57114     | 19406     | 24.1      | 1780             | 11                   | 59435     | 17807     | 21.89     | 1636             |
| 12                  | 57991     | 30057     | 33.0      | 3741             | 12                   | 60158     | 29803     | 32.05     | 3835             |
| 13                  | 64375     | 29209     | 30.0      | 3140             | 13                   | 65678     | 27838     | 28.65     | 3082             |
| 14                  | 67947     | 44731     | 38.3      | 4901             | 14                   | 70737     | 42721     | 36.39     | 4724             |
| 15                  | 58388     | 32544     | 34.5      | 3358             | 15                   | 58485     | 32261     | 34.24     | 3088             |
| 16                  | 68952     | 23647     | 24.5      | 2106             | 16                   | 68871     | 24119     | 24.88     | 2194             |
| 17                  | 66788     | 27680     | 28.1      | 3047             | 17                   | 65875     | 28038     | 28.66     | 2789             |
| 18                  | 54616     | 12751     | 18.0      | 1047             | 18                   | 53203     | 12514     | 18.12     | 827              |
| 19                  | 48079     | 25287     | 33.0      | 2251             | 19                   | 49784     | 24721     | 31.78     | 2160             |
| 20                  | 58321     | 30933     | 33.3      | 2679             | 20                   | 58722     | 29828     | 32.33     | 2500             |
| 21                  | 60883     | 17463     | 21.4      | 1851             | 21                   | 60836     | 15843     | 19.84     | 1619             |
| <i>Mean</i>         | 60314     | 26701     | 28.9      | 2718             |                      | 61071     | 25954     | 28.08     | 2587             |
| <i>SD</i>           | 6301      | 8603      | 6.3       | 1074             |                      | 6353      | 8442      | 6.09      | 1093             |
| <i>SEM</i>          | 1899.967  | 2593.925  | 1.886     | 323.698          |                      | 1915.598  | 2545.500  | 1.836     | 329.539          |
| <b>Pre-Training</b> |           |           |           |                  | <b>Post-Training</b> |           |           |           |                  |
| <b>Control</b>      |           |           |           |                  | <b>Control</b>       |           |           |           |                  |
| Subjects            | TB-LM (g) | TB-FM (g) | TB-FM (%) | Abdominal FM (g) | Subjects             | TB-LM (g) | TB-FM (g) | TB-FM (%) | Abdominal FM (g) |
| 22                  | 68740     | 31615     | 30.3      | 2612             | 22                   | 65840     | 31415     | 30.98     | 2556             |
| 23                  | 63454     | 16848     | 20.1      | 1502             | 23                   | 64882     | 16728     | 19.63     | 1579             |
| 24                  | 48021     | 17549     | 25.7      | 1755             | 24                   | 46843     | 19313     | 28.02     | 1736             |
| 25                  | 61510     | 18110     | 21.7      | 1307             | 25                   | 62849     | 20117     | 23.21     | 1576             |
| 26                  | 63686     | 30261     | 31.0      | 3089             | 26                   | 65644     | 32342     | 31.87     | 3385             |
| 27                  | 59997     | 28532     | 30.8      | 2799             | 27                   | 58999     | 28834     | 31.38     | 2916             |
| 28                  | 60506     | 26895     | 29.8      | 2988             | 28                   | 57752     | 28927     | 32.26     | 3052             |
| 29                  | 65656     | 41045     | 37.0      | 4226             | 29                   | 65656     | 41045     | 36.96     | 4226             |
| 30                  | 57965     | 40986     | 40.0      | 4044             | 30                   | 54179     | 40143     | 41.06     | 3956             |
| 31                  | 71452     | 14419     | 16.0      | 1627             | 31                   | 70667     | 17030     | 18.55     | 1705             |
| 32                  | 67712     | 32055     | 31.0      | 3198             | 32                   | 66756     | 31091     | 30.62     | 3504             |
| <i>Mean</i>         | 62609     | 27120     | 28.5      | 2650             |                      | 61824     | 27908     | 29.51     | 2745             |
| <i>SD</i>           | 6323      | 9393      | 7.1       | 1001             |                      | 6825      | 8626      | 6.84      | 981              |
| <i>SEM</i>          | 1906.487  | 2832.048  | 2.146     | 301.919          |                      | 2057.731  | 2600.978  | 2.063     | 295.890          |

| PRE Training |                   |                 |                                   |
|--------------|-------------------|-----------------|-----------------------------------|
| Football     |                   |                 |                                   |
| Subject      | est Duration (mi) | Last WL (Watts) | VO <sub>2submax</sub> (kg/ml/min) |
| 1            | 8.08              | 250             | 26.2                              |
| 2            | 5.42              | 175             | 22.73                             |
| 3            | 5.87              | 175             | 19.7                              |
| 4            | 7.22              | 225             | 30.8                              |
| 5            | 7.52              | 225             | 28.1                              |
| 6            | 4.75              | 150             | 20.1                              |
| 7            | 7.08              | 225             | 25.6                              |
| 8            | 4.60              | 150             | 21.3                              |
| 9            | 9.23              | 275             | 26.2                              |
| 10           | 6.95              | 200             | 26.4                              |
| <i>M</i>     | 6.7               | 205.0           | 24.7                              |
| <i>SD</i>    | 1.5               | 42.2            | 3.6                               |
| <i>SEM</i>   | 0.5               | 13.3            | 1.1                               |

| POST Training |                   |                 |                                   |
|---------------|-------------------|-----------------|-----------------------------------|
| Football      |                   |                 |                                   |
| Subject       | est Duration (mi) | Last WL (Watts) | VO <sub>2submax</sub> (kg/ml/min) |
| 1             | 9.72              | 275             | 30.33                             |
| 2             | 6.62              | 200             | 24.6                              |
| 3             | 9.57              | 275             | 29.05                             |
| 4             | 7.93              | 225             | 33                                |
| 5             | 8.25              | 250             | 29.76                             |
| 6             | 8.22              | 250             | 32.28                             |
| 7             | 8.35              | 250             | 27.65                             |
| 8             | 5.53              | 175             | 24.14                             |
| 9             | 9.47              | 275             | 28.36                             |
| 10            | 8.97              | 250.0           | 30.17                             |
| <i>M</i>      | 8.3               | 242.5           | 28.9                              |
| <i>SD</i>     | 1.3               | 33.4            | 2.9                               |
| <i>SEM</i>    | 0.4               | 10.6            | 0.9                               |

| Cycling    |      |                 |                                   |
|------------|------|-----------------|-----------------------------------|
| Subject    |      | Last WL (Watts) | VO <sub>2submax</sub> (kg/ml/min) |
| 11         | 4.42 | 150             | 15                                |
| 12         | 7.32 | 225             | 28.1                              |
| 13         | 7.78 | 225             | 24.6                              |
| 14         | 8.85 | 250             | 30.2                              |
| 15         | 5.72 | 175             | 19.3                              |
| 16         | 8.27 | 250             | 25.05                             |
| 17         | 7.90 | 225             | 25.3                              |
| 18         | 5.87 | 175             | 24.5                              |
| 19         | 5.87 | 175             | 22.5                              |
| 20         | 7.77 | 225             | 25.4                              |
| 21         | 6.83 | 200.0           | 26.1                              |
| <i>M</i>   | 7.0  | 206.8           | 24.2                              |
| <i>SD</i>  | 1.3  | 33.7            | 4.1                               |
| <i>SEM</i> | 0.4  | 10.2            | 1.2                               |

| Cycling    |       |                 |                                   |
|------------|-------|-----------------|-----------------------------------|
| Subject    |       | Last WL (Watts) | VO <sub>2submax</sub> (kg/ml/min) |
| 11         | 8.15  | 250             | 27.9                              |
| 12         | 8.67  | 250             | 32                                |
| 13         | 9.10  | 275             | 28.2                              |
| 14         | 11.95 | 325             | 35                                |
| 15         | 6.15  | 200             | 22.4                              |
| 16         | 8.95  | 275             | 26                                |
| 17         | 9.18  | 275             | 25.9                              |
| 18         | 8.13  | 250             | 27.5                              |
| 19         | 7.42  | 225             | 28.3                              |
| 20         | 8.08  | 250.0           | 30.1                              |
| 21         | 8.48  | 250.0           | 26.4                              |
| <i>M</i>   | 8.6   | 256.8           | 28.1                              |
| <i>SD</i>  | 1.4   | 31.8            | 3.3                               |
| <i>SEM</i> | 0.4   | 9.6             | 1.0                               |

| PRE Training |      |                 |                                   |
|--------------|------|-----------------|-----------------------------------|
| Control      |      |                 |                                   |
| Subject      |      | Last WL (Watts) | VO <sub>2submax</sub> (kg/ml/min) |
| 22           | 7.52 | 225             | 28.1                              |
| 23           | 7.08 | 225             | 28.8                              |
| 24           | 7.53 | 225             | 35.9                              |
| 25           | 7.67 | 225             | 24.8                              |
| 26           | 7.08 | 225             | 25.1                              |
| 27           | 8.33 | 250             | 28.8                              |
| 28           | 8.95 | 250             | 28.3                              |
| 29           | 4.82 | 150             | 15.7                              |
| 30           | 8.28 | 250             | 23.3                              |
| 31           | 9.20 | 275             | 27.7                              |
| 32           | 6.72 | 200             | 21.2                              |
| <i>M</i>     | 7.5  | 227.3           | 26.5                              |
| <i>SD</i>    | 1.2  | 32.5            | 5.4                               |
| <i>SEM</i>   | 0.4  | 9.8             | 1.6                               |

| POST Training |      |                 |                                   |
|---------------|------|-----------------|-----------------------------------|
| Control       |      |                 |                                   |
| Subject       |      | Last WL (Watts) | VO <sub>2submax</sub> (kg/ml/min) |
| 22            | 7.52 | 225             | 28.1                              |
| 23            | 6.08 | 200             | 24.1                              |
| 24            | 7.53 | 225             | 32.0                              |
| 25            | 7.85 | 225             | 25.8                              |
| 26            | 8.08 | 250             | 24.8                              |
| 27            | 8.33 | 250             | 28.8                              |
| 28            | 9.45 | 275             | 27.6                              |
| 29            | 4.82 | 150             | 14.6                              |
| 30            | 8.58 | 250             | 22.8                              |
| 31            | 9.20 | 275             | 27.0                              |
| 32            | 6.72 | 200.0           | 21.2                              |
| <i>M</i>      | 7.6  | 229.5           | 25.7                              |
| <i>SD</i>     | 1.4  | 36.8            | 5.2                               |
| <i>SEM</i>    | 0.4  | 11.1            | 1.4                               |

| GLUCOSE - AUC |               |       |       |        |      |            |        |       |       |        |      |            |        |       |       |        |      |
|---------------|---------------|-------|-------|--------|------|------------|--------|-------|-------|--------|------|------------|--------|-------|-------|--------|------|
| SSG           |               |       |       |        |      | Cycling    |        |       |       |        |      | Control    |        |       |       |        |      |
| Subject       | PRE-Training  |       |       |        | SUM  | Subject    |        |       |       |        | SUM  | Subject    |        |       |       |        | SUM  |
|               | Pre-30        | 30-60 | 60-90 | 90-120 |      |            | Pre-30 | 30-60 | 60-90 | 90-120 |      |            | Pre-30 | 30-60 | 60-90 | 90-120 |      |
| 1             | 2.4           | 2.8   | 2.5   | 2.1    | 9.8  | 11         | 3.7    | 4.9   | 3.5   | 2.3    | 14.3 | 22         | 2.5    | 3.6   | 3.2   | 2.3    | 11.6 |
| 2             | 3.4           | 4.5   | 4.9   | 4.8    | 17.6 | 12         | 3.5    | 5.2   | 5.5   | 5.1    | 19.3 | 23         | 3.2    | 3.5   | 2.5   | 1.9    | 11.1 |
| 3             | 3.3           | 4.4   | 4.6   | 3.4    | 15.7 | 13         | 3.9    | 5.0   | 5.0   | 4.6    | 18.5 | 24         | 2.8    | 3.7   | 3.6   | 3.2    | 13.2 |
| 4             | 2.3           | 2.3   | 2.2   | 2.6    | 9.5  | 14         | 3.3    | 4.1   | 3.9   | 3.4    | 14.6 | 25         | 3.1    | 3.8   | 3.2   | 2.2    | 12.3 |
| 5             | 3.4           | 4.3   | 3.9   | 2.9    | 14.5 | 15         | 4.2    | 5.6   | 5.9   | 4.6    | 20.3 | 26         | 4.2    | 5.5   | 5.4   | 4.8    | 19.8 |
| 6             | 2.8           | 2.9   | 2.5   | 1.8    | 10.0 | 16         | 2.9    | 3.0   | 2.1   | 2.0    | 9.9  | 27         | 3.6    | 3.4   | 2.3   | 2.1    | 11.3 |
| 7             | 2.5           | 2.4   | 1.8   | 1.6    | 8.3  | 17         | 3.4    | 3.6   | 2.7   | 2.0    | 11.7 | 28         | 3.0    | 3.2   | 2.8   | 2.5    | 11.5 |
| 8             | 3.0           | 3.9   | 3.9   | 2.9    | 13.7 | 18         | 2.7    | 2.9   | 2.3   | 2.3    | 10.1 | 29         | 3.5    | 3.8   | 3.1   | 2.6    | 13.0 |
| 9             | 3.2           | 4.1   | 3.7   | 3.4    | 14.5 | 19         | 2.8    | 3.2   | 2.8   | 2.4    | 11.1 | 30         | 2.5    | 2.6   | 2.5   | 2.7    | 10.3 |
| 10            | 3.5           | 4.2   | 3.4   | 2.6    | 13.6 | 20         | 3.2    | 3.7   | 2.9   | 2.3    | 12.0 | 31         | 3.4    | 4.7   | 4.3   | 2.9    | 15.3 |
|               |               |       |       |        |      | 21         | 2.9    | 3.7   | 3.3   | 2.8    | 12.7 | 32         | 3.3    | 3.9   | 3.6   | 2.9    | 13.7 |
| <b>M</b>      | 3.0           | 3.6   | 3.3   | 2.8    | 12.7 | <b>M</b>   | 3.3    | 4.1   | 3.6   | 3.0    | 14.1 | <b>M</b>   | 3.2    | 3.8   | 3.3   | 2.7    | 13.0 |
| <b>SD</b>     | 0.4           | 0.9   | 1.1   | 0.9    | 3.1  | <b>SD</b>  | 0.5    | 0.9   | 1.3   | 1.2    | 3.7  | <b>SD</b>  | 0.5    | 0.7   | 0.9   | 0.8    | 2.7  |
| <b>SEM</b>    | 0.1           | 0.3   | 0.3   | 0.3    | 1.0  | <b>SEM</b> | 0.1    | 0.3   | 0.4   | 0.3    | 1.1  | <b>SEM</b> | 0.2    | 0.2   | 0.3   | 0.2    | 0.8  |
| SSG           |               |       |       |        |      | Cycling    |        |       |       |        |      | Control    |        |       |       |        |      |
| Subject       | Post Training |       |       |        | SUM  | Subject    |        |       |       |        | SUM  | Subject    |        |       |       |        | SUM  |
|               | Pre-30        | 30-60 | 60-90 | 90-120 |      |            | Pre-30 | 30-60 | 60-90 | 90-120 |      |            | Pre-30 | 30-60 | 60-90 | 90-120 |      |
| 1             | 2.7           | 2.3   | 1.5   | 1.4    | 7.9  | 11         | 3.0    | 3.5   | 2.6   | 1.7    | 10.8 | 22         | 2.7    | 3.0   | 2.1   | 1.6    | 9.4  |
| 2             | 3.0           | 3.5   | 3.0   | 2.6    | 12.0 | 12         | 3.8    | 4.3   | 3.4   | 3.0    | 14.5 | 23         | 3.4    | 3.9   | 3.6   | 2.6    | 13.4 |
| 3             | 3.0           | 3.6   | 3.1   | 2.0    | 11.7 | 13         | 3.4    | 4.7   | 4.0   | 3.1    | 15.2 | 24         | 2.6    | 3.3   | 2.8   | 2.2    | 10.9 |
| 4             | 2.3           | 2.3   | 2.2   | 2.6    | 9.5  | 14         | 3.2    | 3.6   | 3.0   | 2.6    | 12.3 | 25         | 3.8    | 4.8   | 3.9   | 2.6    | 15.1 |
| 5             | 2.4           | 2.8   | 2.2   | 2.1    | 9.4  | 15         | 4.3    | 5.8   | 5.9   | 5.3    | 21.3 | 26         | 3.4    | 3.4   | 3.3   | 2.5    | 12.5 |
| 6             | 3.0           | 3.2   | 2.6   | 2.0    | 10.7 | 16         | 2.7    | 3.1   | 2.5   | 1.7    | 9.9  | 27         | 3.1    | 3.1   | 2.1   | 2.0    | 10.3 |
| 7             | 2.7           | 3.0   | 2.3   | 1.7    | 9.6  | 17         | 2.8    | 2.8   | 2.2   | 1.4    | 9.1  | 28         | 3.3    | 4.2   | 3.5   | 3.2    | 14.2 |
| 8             | 3.3           | 3.8   | 2.7   | 1.9    | 11.7 | 18         | 2.8    | 2.5   | 1.5   | 1.2    | 7.9  | 29         | 4.5    | 5.4   | 4.8   | 4.1    | 18.8 |
| 9             | 3.3           | 3.8   | 3.0   | 2.3    | 12.4 | 19         | 2.5    | 2.6   | 2.1   | 1.9    | 9.1  | 30         | 2.6    | 3.3   | 3.1   | 2.8    | 11.7 |
| 10            | 2.8           | 2.8   | 2.0   | 1.9    | 9.5  | 20         | 2.7    | 3.1   | 2.6   | 2.4    | 10.7 | 31         | 3.2    | 4.1   | 3.5   | 2.4    | 13.2 |
|               |               |       |       |        |      | 21         | 2.8    | 3.1   | 2.4   | 1.8    | 10.1 | 32         | 3.7    | 4.6   | 3.4   | 2.3    | 14.0 |
| <b>M</b>      | 2.8           | 3.1   | 2.4   | 2.0    | 10.4 | <b>M</b>   | 3.1    | 3.5   | 2.9   | 2.4    | 11.9 | <b>M</b>   | 3.3    | 3.9   | 3.3   | 2.6    | 13.0 |
| <b>SD</b>     | 0.3           | 0.6   | 0.5   | 0.4    | 1.5  | <b>SD</b>  | 0.5    | 1.0   | 1.2   | 1.2    | 3.9  | <b>SD</b>  | 0.6    | 0.8   | 0.8   | 0.7    | 2.6  |
| <b>SEM</b>    | 0.1           | 0.2   | 0.1   | 0.1    | 0.4  | <b>SEM</b> | 0.2    | 0.3   | 0.4   | 0.4    | 1.2  | <b>SEM</b> | 0.2    | 0.2   | 0.2   | 0.2    | 0.8  |



| INSULIN - AUC |              |       |       |        |       | Cycling    |        |       |       |        |       | Control    |        |       |       |        |       |
|---------------|--------------|-------|-------|--------|-------|------------|--------|-------|-------|--------|-------|------------|--------|-------|-------|--------|-------|
| SSG           |              |       |       |        |       | Cycling    |        |       |       |        |       | Control    |        |       |       |        |       |
| Subject       | PRE-Training |       |       |        | SUM   | Subject    |        |       |       |        | SUM   | Subject    |        |       |       |        | SUM   |
|               | Pre-30       | 30-60 | 60-90 | 90-120 |       |            | Pre-30 | 30-60 | 60-90 | 90-120 |       |            | Pre-30 | 30-60 | 60-90 | 90-120 |       |
| 1             | 13.0         | 33.8  | 31.5  | 17.5   | 95.8  | 11         | 9.6    | 25.6  | 21.8  | 10.5   | 67.5  | 22         | 12.9   | 33.6  | 43.1  | 30.9   | 120.5 |
| 2             | 24.5         | 73.1  | 105.8 | 93.0   | 296.3 | 12         | 14.6   | 31.9  | 46.3  | 53.8   | 146.5 | 23         | 3.5    | 7.6   | 8.9   | 7.9    | 28.0  |
| 3             | 5.7          | 14.6  | 23.7  | 24.6   | 68.7  | 13         | 12.8   | 16.2  | 17.5  | 23.2   | 69.7  | 24         | 4.6    | 10.2  | 14.5  | 16.8   | 46.0  |
| 4             | 8.3          | 12.1  | 9.9   | 9.4    | 39.7  | 14         | 33.6   | 51.9  | 52.6  | 47.7   | 185.7 | 25         | 4.7    | 11.5  | 15.1  | 11.9   | 43.1  |
| 5             | 4.4          | 17.4  | 26.1  | 19.3   | 67.1  | 15         | 23.0   | 64.4  | 112.5 | 105.5  | 305.4 | 26         | 22.7   | 51.1  | 73.3  | 79.3   | 226.3 |
| 6             | 8.2          | 15.1  | 16.2  | 14.2   | 53.7  | 16         | 24.0   | 36.2  | 21.3  | 12.9   | 94.3  | 27         | 29.9   | 43.7  | 29.0  | 24.1   | 126.8 |
| 7             | 13.9         | 24.3  | 19.2  | 13.2   | 70.6  | 17         | 15.3   | 35.7  | 32.4  | 13.7   | 97.1  | 28         | 21.6   | 35.2  | 35.3  | 27.5   | 119.5 |
| 8             | 14.3         | 30.5  | 49.0  | 55.4   | 149.2 | 18         | 17.4   | 27.2  | 17.4  | 15.4   | 77.4  | 29         | 53.0   | 76.0  | 63.0  | 66.0   | 258.0 |
| 9             | 16.7         | 33.4  | 33.6  | 26.3   | 110.0 | 19         | 4.3    | 7.5   | 8.6   | 11.5   | 31.8  | 30         | 14.5   | 27.8  | 28.5  | 27.1   | 97.9  |
| 10            | 13.1         | 22.8  | 20.6  | 14.0   | 70.4  | 20         | 11.1   | 20.3  | 16.2  | 12.2   | 59.8  | 31         | 5.0    | 13.2  | 16.6  | 15.3   | 50.0  |
|               |              |       |       |        |       | 21         | 6.6    | 16.8  | 18.7  | 16.5   | 58.5  | 32         | 14.7   | 31.3  | 36.8  | 29.0   | 111.7 |
| <b>M</b>      | 12.2         | 27.7  | 33.5  | 28.7   | 102.1 | <b>M</b>   | 15.7   | 30.3  | 33.2  | 29.3   | 108.5 | <b>M</b>   | 17.0   | 31.0  | 33.1  | 30.5   | 111.6 |
| <b>SD</b>     | 5.9          | 17.8  | 27.6  | 26.1   | 75.0  | <b>SD</b>  | 8.5    | 16.5  | 29.5  | 29.3   | 78.4  | <b>SD</b>  | 14.7   | 20.8  | 20.5  | 22.3   | 74.1  |
| <b>SEM</b>    | 1.9          | 5.6   | 8.7   | 8.3    | 23.7  | <b>SEM</b> | 2.6    | 5.0   | 8.9   | 8.8    | 23.6  | <b>SEM</b> | 4.4    | 6.3   | 6.2   | 6.7    | 22.3  |

| SSG        |               |       |       |        |       | Cycling    |        |       |       |        |       | Control    |        |       |       |        |       |
|------------|---------------|-------|-------|--------|-------|------------|--------|-------|-------|--------|-------|------------|--------|-------|-------|--------|-------|
| Subject    | Post Training |       |       |        | SUM   | Subject    |        |       |       |        | SUM   | Subject    |        |       |       |        | SUM   |
|            | Pre-30        | 30-60 | 60-90 | 90-120 |       |            | Pre-30 | 30-60 | 60-90 | 90-120 |       |            | Pre-30 | 30-60 | 60-90 | 90-120 |       |
| 1          | 8.1           | 13.4  | 12.8  | 13.8   | 48.0  | 11         | 4.7    | 11.5  | 13.7  | 11.9   | 41.7  | 22         | 18.3   | 55.3  | 48.5  | 15.4   | 137.5 |
| 2          | 16.1          | 42.5  | 56.3  | 54.3   | 169.0 | 12         | 19.2   | 45.4  | 61.0  | 61.0   | 186.6 | 23         | 3.5    | 6.6   | 13.6  | 53.8   | 77.5  |
| 3          | 4.4           | 12.6  | 20.6  | 21.9   | 59.5  | 13         | 5.1    | 12.6  | 41.7  | 49.4   | 108.7 | 24         | 5.2    | 13.3  | 31.1  | 28.8   | 78.3  |
| 4          | 6.7           | 12.4  | 11.8  | 9.6    | 40.5  | 14         | 29.9   | 50.4  | 40.6  | 33.9   | 154.8 | 25         | 8.0    | 17.6  | 20.2  | 13.1   | 58.8  |
| 5          | 7.5           | 12.5  | 11.2  | 11.8   | 42.8  | 15         | 23.2   | 55.9  | 91.5  | 91.8   | 262.4 | 26         | 29.8   | 57.2  | 68.0  | 48.7   | 203.7 |
| 6          | 6.7           | 14.2  | 14.0  | 10.6   | 45.5  | 16         | 25.6   | 48.5  | 39.0  | 24.0   | 137.0 | 27         | 31.4   | 46.5  | 26.7  | 16.2   | 120.7 |
| 7          | 11.1          | 22.7  | 20.2  | 13.9   | 67.9  | 17         | 14.4   | 37.1  | 33.6  | 12.3   | 97.4  | 28         | 55.2   | 86.8  | 59.5  | 68.2   | 269.6 |
| 8          | 10.2          | 27.5  | 28.5  | 15.8   | 82.0  | 18         | 12.2   | 21.9  | 17.1  | 10.2   | 61.4  | 29         | 60.1   | 88.8  | 81.3  | 75.8   | 305.8 |
| 9          | 14.8          | 30.6  | 37.3  | 29.4   | 112.1 | 19         | 4.0    | 10.3  | 9.8   | 7.5    | 31.6  | 30         | 12.0   | 21.9  | 29.1  | 28.5   | 91.4  |
| 10         | 10.6          | 18.7  | 12.4  | 8.6    | 50.3  | 20         | 1.0    | 4.8   | 8.6   | 10.6   | 25.0  | 31         | 4.7    | 11.5  | 18.2  | 20.8   | 55.2  |
|            |               |       |       |        |       | 21         | 7.1    | 14.0  | 12.4  | 10.1   | 43.6  | 32         | 12.1   | 54.0  | 60.6  | 22.6   | 149.2 |
| <b>M</b>   | 9.6           | 23.3  | 22.5  | 19.0   | 71.7  | <b>M</b>   | 13.3   | 28.4  | 33.5  | 29.3   | 104.6 | <b>M</b>   | 21.8   | 41.7  | 41.5  | 35.6   | 140.7 |
| <b>SD</b>  | 3.7           | 14.1  | 14.6  | 13.9   | 40.7  | <b>SD</b>  | 9.9    | 19.2  | 25.6  | 27.4   | 75.1  | <b>SD</b>  | 20.1   | 29.6  | 23.0  | 22.3   | 85.2  |
| <b>SEM</b> | 1.2           | 3.2   | 4.6   | 4.4    | 12.9  | <b>SEM</b> | 3.0    | 5.8   | 7.7   | 8.3    | 22.7  | <b>SEM</b> | 6.1    | 8.9   | 6.9   | 6.7    | 25.7  |

**Matsuda ISI**

| SSG        | Pre  |      | Post |      | CYC | Pre  |      | Post |  | CON | Pre |  | Post |  |
|------------|------|------|------|------|-----|------|------|------|--|-----|-----|--|------|--|
|            | 9.6  | 13.9 | 10.2 | 19.9 |     | 8.3  | 7.4  |      |  |     |     |  |      |  |
|            | 1.4  | 3.6  | 3.3  | 2.9  |     | 22.0 | 9.9  |      |  |     |     |  |      |  |
|            | 6.4  | 10.7 | 4.6  | 4.6  |     | 17.2 | 14.7 |      |  |     |     |  |      |  |
|            | 22.6 | 22.4 | 2.1  | 2.8  |     | 17.1 | 8.2  |      |  |     |     |  |      |  |
|            | 10.5 | 17.5 | 1.3  | 1.4  |     | 1.7  | 2.1  |      |  |     |     |  |      |  |
|            | 10.2 | 13.4 | 6.2  | 5.2  |     | 3.8  | 5.7  |      |  |     |     |  |      |  |
|            | 10.8 | 13.0 | 5.8  | 7.5  |     | 4.0  | 2.3  |      |  |     |     |  |      |  |
|            | 6.0  | 5.1  | 15.7 | 19.3 |     | 2.0  | 1.3  |      |  |     |     |  |      |  |
|            | 4.1  | 6.8  | 20.9 | 24.4 |     | 5.1  | 5.8  |      |  |     |     |  |      |  |
|            | 5.6  | 12.2 | 14.9 | 24.6 |     | 13.2 | 9.5  |      |  |     |     |  |      |  |
| <b>M</b>   | 8.7  | 11.8 | 8.5  | 11.3 |     | 9.4  | 6.7  |      |  |     |     |  |      |  |
| <b>SD</b>  | 5.8  | 5.7  | 6.7  | 9.6  |     | 7.4  | 4.2  |      |  |     |     |  |      |  |
| <b>SEM</b> | 1.8  | 1.8  | 2.1  | 3.0  |     | 2.3  | 1.3  |      |  |     |     |  |      |  |

**NRF2**

| CON       | pre         | post        |
|-----------|-------------|-------------|
| 25        | 0.29        | 0.39        |
| 23        | 0.31        | 0.32        |
| 27        | 0.18        | 0.39        |
| 22        | 0.44        | 0.36        |
| 32        | 0.52        | 1.23        |
| 28        | 1.17        | 1.42        |
| 26        | 1.30        | 1.16        |
| 24        | 3.57        | 0.95        |
| 31        | 1.23        | 1.34        |
| <b>M</b>  | <b>1.00</b> | <b>0.84</b> |
| <b>SD</b> | <b>1.06</b> | <b>0.47</b> |
| <b>SE</b> | <b>0.35</b> | <b>0.16</b> |

| CYC       | pre         | post        |
|-----------|-------------|-------------|
| 19        | 0.33        | 0.35        |
| 16        | 0.39        | 0.56        |
| 15        | 1.37        | 0.54        |
| 12        | 0.59        | 0.76        |
| 14        | 1.13        | 1.97        |
| 13        | 1.53        | 1.40        |
| 17        | 0.56        | 2.42        |
| 21        | 1.31        | 1.26        |
| 11        | 1.41        | 0.97        |
| 18        | 1.50        | 2.31        |
| 20        | 0.86        | 0.59        |
| <b>M</b>  | <b>1.00</b> | <b>1.26</b> |
| <b>SD</b> | <b>0.49</b> | <b>0.76</b> |
| <b>SE</b> | <b>0.15</b> | <b>0.24</b> |

| SSG       | pre         | post        |
|-----------|-------------|-------------|
| 9         | 0.91        | 0.51        |
| 8         | 0.18        | 0.60        |
| 1         | 0.64        | 1.03        |
| 3         | 0.31        | 0.40        |
| 4         | 0.88        | 0.53        |
| 7         | 3.81        | 2.62        |
| 5         | 0.72        | 0.32        |
| 10        | 0.59        | 0.38        |
| 2         | 1.65        | 0.82        |
| 6         | 0.30        | 0.57        |
| <b>M</b>  | <b>1.00</b> | <b>0.78</b> |
| <b>SD</b> | <b>1.07</b> | <b>0.68</b> |
| <b>SE</b> | <b>0.34</b> | <b>0.22</b> |

**NRF1**

| CON       | pre         | post        |
|-----------|-------------|-------------|
| 25        | 0.34        | 0.77        |
| 23        | 0.78        | 0.93        |
| 27        | 0.65        | 0.38        |
| 22        | 0.79        | 0.28        |
| 32        | 1.78        | 2.20        |
| 28        | 0.67        | 1.21        |
| 26        | 1.22        | 0.54        |
| 24        | 0.61        | 0.52        |
| 31        | 2.17        | 2.00        |
| <b>M</b>  | <b>1.00</b> | <b>0.98</b> |
| <b>SD</b> | <b>0.61</b> | <b>0.69</b> |
| <b>SE</b> | <b>0.20</b> | <b>0.23</b> |

| CYC       | pre         | post        |
|-----------|-------------|-------------|
| 19        | 0.31        | 0.31        |
| 16        | 1.91        | 1.65        |
| 15        | 0.23        | 0.60        |
| 12        | 2.01        | 1.27        |
| 14        | 1.53        | 1.37        |
| 13        | 0.95        | 1.07        |
| 17        | 0.93        | 2.48        |
| 21        | 0.80        | 0.61        |
| 11        | 0.76        | 0.66        |
| 18        | 1.13        | 1.20        |
| 20        | 0.44        | 0.45        |
| <b>M</b>  | <b>1.00</b> | <b>1.12</b> |
| <b>SD</b> | <b>0.60</b> | <b>0.63</b> |
| <b>SE</b> | <b>0.19</b> | <b>0.20</b> |

| SSG       | pre         | post        |
|-----------|-------------|-------------|
| 9         | 0.34        | 0.70        |
| 8         | 0.49        | 1.17        |
| 1         | 0.55        | 0.23        |
| 3         | 0.60        | 0.56        |
| 4         | 0.93        | 0.51        |
| 7         | 1.75        | 1.44        |
| 5         | 1.65        | 0.61        |
| 10        | 1.85        | 0.79        |
| 2         | 1.41        | 0.67        |
| 6         | 0.43        | 0.25        |
| <b>M</b>  | <b>1.00</b> | <b>0.69</b> |
| <b>SD</b> | <b>0.60</b> | <b>0.37</b> |
| <b>SE</b> | <b>0.19</b> | <b>0.12</b> |

**MEF2A**

| CON       | pre         | post        |
|-----------|-------------|-------------|
| 25        | 0.15        | 0.52        |
| 23        | 1.09        | 1.31        |
| 27        | 0.49        | 0.12        |
| 22        | 0.33        | 0.09        |
| 32        | 0.88        | 0.54        |
| 28        | 0.90        | 1.50        |
| 26        | 0.15        | 0.05        |
| 24        | 0.56        | 0.18        |
| 31        | 4.45        | 1.95        |
| <b>M</b>  | <b>1.00</b> | <b>0.69</b> |
| <b>SD</b> | <b>1.34</b> | <b>0.71</b> |
| <b>SE</b> | <b>0.45</b> | <b>0.24</b> |

| CYC       | pre         | post        |
|-----------|-------------|-------------|
| 19        | 0.14        | 0.07        |
| 16        | 1.61        | 2.14        |
| 15        | 0.24        | 0.55        |
| 12        | 2.72        | 2.12        |
| 14        | 0.40        | 0.74        |
| 13        | 3.54        | 1.25        |
| 17        | 0.46        | 0.73        |
| 21        | 0.36        | 0.60        |
| 11        | 0.38        | 0.54        |
| 18        | 0.63        | 0.73        |
| 20        | 0.51        | 0.43        |
| <b>M</b>  | <b>1.00</b> | <b>0.90</b> |
| <b>SD</b> | <b>1.19</b> | <b>0.69</b> |
| <b>SE</b> | <b>0.38</b> | <b>0.22</b> |

| SSG       | pre         | post        |
|-----------|-------------|-------------|
| 9         | 0.39        | 1.58        |
| 8         | 0.59        | 2.11        |
| 1         | 1.63        | 0.58        |
| 3         | 0.63        | 0.65        |
| 4         | 0.56        | 0.22        |
| 7         | 1.81        | 2.83        |
| 5         | 1.10        | 0.60        |
| 10        | 2.77        | 1.88        |
| 2         | 0.35        | 0.13        |
| 6         | 0.17        | 0.06        |
| <b>M</b>  | <b>1.00</b> | <b>1.06</b> |
| <b>SD</b> | <b>0.83</b> | <b>0.96</b> |
| <b>SE</b> | <b>0.26</b> | <b>0.30</b> |

**Tfam**

| CON       | pre         | post        |
|-----------|-------------|-------------|
| 25        | 0.81        | 1.56        |
| 23        | 1.25        | 1.74        |
| 27        | 2.60        | 0.63        |
| 22        | 1.28        | 0.68        |
| 32        | 0.79        | 0.65        |
| 28        | 0.53        | 0.62        |
| 26        | 0.79        | 0.29        |
| 24        | 0.29        | 0.32        |
| 31        | 0.66        | 0.92        |
| <b>M</b>  | <b>1.00</b> | <b>0.82</b> |
| <b>SD</b> | <b>0.68</b> | <b>0.51</b> |
| <b>SE</b> | <b>0.23</b> | <b>0.17</b> |

| CYC       | pre         | post        |
|-----------|-------------|-------------|
| 19        | 0.43        | 0.45        |
| 16        | 2.07        | 1.34        |
| 15        | 0.36        | 1.19        |
| 12        | 3.51        | 2.74        |
| 14        | 1.81        | 0.40        |
| 13        | 0.93        | 0.76        |
| 17        | 0.22        | 0.77        |
| 21        | 0.47        | 0.24        |
| 11        | 0.51        | 0.33        |
| 18        | 0.64        | 0.46        |
| 20        | 0.06        | 0.24        |
| <b>M</b>  | <b>1.00</b> | <b>0.81</b> |
| <b>SD</b> | <b>1.05</b> | <b>0.75</b> |
| <b>SE</b> | <b>0.33</b> | <b>0.24</b> |

| SSG       | pre         | post        |
|-----------|-------------|-------------|
| 9         | 0.42        | 1.33        |
| 8         | 1.26        | 1.44        |
| 1         | 1.31        | 0.75        |
| 3         | 1.62        | 0.77        |
| 4         | 0.40        | 0.17        |
| 7         | 0.72        | 1.29        |
| 5         | 1.13        | 0.33        |
| 10        | 1.63        | 1.00        |
| 2         | 1.10        | 0.36        |
| 6         | 0.39        | 0.01        |
| <b>M</b>  | <b>1.00</b> | <b>0.74</b> |
| <b>SD</b> | <b>0.48</b> | <b>0.51</b> |
| <b>SE</b> | <b>0.15</b> | <b>0.16</b> |

**COXI**

| CON       | pre         | post        |
|-----------|-------------|-------------|
| 25        | 0.80        | 1.44        |
| 23        | 1.48        | 1.91        |
| 27        | 2.34        | 0.73        |
| 22        | 1.97        | 0.65        |
| 32        | 0.73        | 0.71        |
| 28        | 0.44        | 0.60        |
| 26        | 0.28        | 0.02        |
| 24        | 0.32        | 0.45        |
| 31        | 0.64        | 1.79        |
| <b>M</b>  | <b>1.00</b> | <b>0.92</b> |
| <b>SD</b> | <b>0.75</b> | <b>0.64</b> |
| <b>SE</b> | <b>0.25</b> | <b>0.21</b> |

| CYC       | pre         | post        |
|-----------|-------------|-------------|
| 19        | 0.39        | 0.54        |
| 16        | 2.64        | 1.87        |
| 15        | 0.37        | 1.41        |
| 12        | 2.01        | 2.12        |
| 14        | 2.38        | 0.88        |
| 13        | 0.95        | 1.82        |
| 17        | 0.56        | 1.77        |
| 21        | 0.63        | 0.56        |
| 11        | 0.54        | 1.30        |
| 18        | 0.22        | 0.74        |
| 20        | 0.31        | 0.27        |
| <b>M</b>  | <b>1.00</b> | <b>1.20</b> |
| <b>SD</b> | <b>0.91</b> | <b>0.59</b> |
| <b>SE</b> | <b>0.27</b> | <b>0.18</b> |

| SSG       | pre         | post        |
|-----------|-------------|-------------|
| 9         | 0.44        | 0.86        |
| 8         | 1.46        | 2.43        |
| 1         | 1.15        | 0.94        |
| 3         | 1.41        | 2.08        |
| 4         | 0.30        | 0.20        |
| 7         | 1.01        | 2.94        |
| 5         | 1.51        | 0.62        |
| 10        | 1.66        | 1.31        |
| 2         | 0.99        | 0.64        |
| 6         | 0.08        | 0.05        |
| <b>M</b>  | <b>1.00</b> | <b>1.21</b> |
| <b>SD</b> | <b>0.55</b> | <b>0.97</b> |
| <b>SE</b> | <b>0.17</b> | <b>0.31</b> |

**COXII**

| CON       | pre         | post        |
|-----------|-------------|-------------|
| 25        | 0.72        | 1.13        |
| 23        | 0.43        | 0.72        |
| 27        | 1.73        | 0.57        |
| 22        | 1.30        | 0.50        |
| 32        | 1.03        | 0.95        |
| 28        | 0.45        | 0.53        |
| 26        | 1.15        | 0.23        |
| 24        | 0.79        | 0.81        |
| 31        | 1.40        | 1.49        |
| <b>M</b>  | <b>1.00</b> | <b>0.77</b> |
| <b>SD</b> | <b>0.44</b> | <b>0.38</b> |
| <b>SE</b> | <b>0.15</b> | <b>0.13</b> |

| CYC       | pre         | post        |
|-----------|-------------|-------------|
| 19        | 0.37        | 0.46        |
| 16        | 1.36        | 1.29        |
| 15        | 0.39        | 0.96        |
| 12        | 2.05        | 2.36        |
| 14        | 2.55        | 0.88        |
| 13        | 1.09        | 1.38        |
| 17        | 0.48        | 1.03        |
| 21        | 0.70        | 0.48        |
| 11        | 0.64        | 1.67        |
| 18        | 1.00        | 1.42        |
| 20        | 0.36        | 0.36        |
| <b>M</b>  | <b>1.00</b> | <b>1.12</b> |
| <b>SD</b> | <b>0.74</b> | <b>0.57</b> |
| <b>SE</b> | <b>0.22</b> | <b>0.17</b> |

| SSG       | pre         | post        |
|-----------|-------------|-------------|
| 9         | 0.30        | 0.80        |
| 8         | 0.88        | 1.30        |
| 1         | 0.81        | 0.56        |
| 3         | 1.34        | 1.57        |
| 4         | 0.39        | 0.27        |
| 7         | 0.84        | 1.67        |
| 5         | 1.75        | 0.67        |
| 10        | 1.84        | 2.08        |
| 2         | 1.65        | 1.43        |
| 6         | 0.19        | 0.04        |
| <b>M</b>  | <b>1.00</b> | <b>1.04</b> |
| <b>SD</b> | <b>0.62</b> | <b>0.67</b> |
| <b>SE</b> | <b>0.19</b> | <b>0.21</b> |

**COXIII**

| CON       | pre         | post        |
|-----------|-------------|-------------|
| 25        | 0.34        | 0.94        |
| 23        | 0.87        | 0.86        |
| 27        | 1.08        | 0.39        |
| 22        | 0.92        | 0.27        |
| 32        | 2.79        | 0.81        |
| 28        | 0.38        | 0.37        |
| 26        | 1.03        | 0.48        |
| 24        | 0.87        | 0.69        |
| 31        | 0.73        | 0.80        |
| <b>M</b>  | <b>1.00</b> | <b>0.62</b> |
| <b>SD</b> | <b>0.72</b> | <b>0.25</b> |
| <b>SE</b> | <b>0.24</b> | <b>0.08</b> |

| CYC       | pre         | post        |
|-----------|-------------|-------------|
| 19        | 0.31        | 0.30        |
| 16        | 2.36        | 1.79        |
| 15        | 0.24        | 0.66        |
| 12        | 1.70        | 1.25        |
| 14        | 1.86        | 0.89        |
| 13        | 1.72        | 1.11        |
| 17        | 0.50        | 1.12        |
| 21        | 0.63        | 0.62        |
| 11        | 0.44        | 0.80        |
| 18        | 0.60        | 1.16        |
| 20        | 0.63        | 0.40        |
| <b>M</b>  | <b>1.00</b> | <b>0.92</b> |
| <b>SD</b> | <b>0.78</b> | <b>0.41</b> |
| <b>SE</b> | <b>0.24</b> | <b>0.12</b> |

| SSG       | pre         | post        |
|-----------|-------------|-------------|
| 9         | 0.46        | 0.99        |
| 8         | 1.19        | 2.32        |
| 1         | 0.70        | 0.45        |
| 3         | 1.07        | 1.00        |
| 4         | 0.54        | 0.26        |
| 7         | 1.16        | 2.52        |
| 5         | 1.44        | 1.27        |
| 10        | 2.03        | 0.94        |
| 2         | 1.22        | 0.59        |
| 6         | 0.21        | 0.18        |
| <b>M</b>  | <b>1.00</b> | <b>1.05</b> |
| <b>SD</b> | <b>0.53</b> | <b>0.80</b> |
| <b>SE</b> | <b>0.17</b> | <b>0.25</b> |

**COXIV**

| CON       | pre         | post        |
|-----------|-------------|-------------|
| 25        | 0.78        | 1.40        |
| 23        | 1.27        | 1.73        |
| 27        | 1.70        | 0.55        |
| 22        | 1.60        | 0.62        |
| 32        | 0.83        | 0.94        |
| 28        | 0.43        | 0.48        |
| 26        | 0.33        | 0.25        |
| 24        | 0.89        | 0.61        |
| 31        | 1.17        | 1.46        |
| <b>M</b>  | <b>1.00</b> | <b>0.90</b> |
| <b>SD</b> | <b>0.48</b> | <b>0.52</b> |
| <b>SE</b> | <b>0.16</b> | <b>0.17</b> |

| CYC       | pre         | post        |
|-----------|-------------|-------------|
| 19        | 0.40        | 0.59        |
| 16        | 2.76        | 1.87        |
| 15        | 0.38        | 1.26        |
| 12        | 2.07        | 2.89        |
| 14        | 2.23        | 0.85        |
| 13        | 1.18        | 1.57        |
| 17        | 0.64        | 1.57        |
| 21        | 0.61        | 0.51        |
| 11        | 0.16        | 0.65        |
| 18        | 0.23        | 0.53        |
| 20        | 0.33        | 0.38        |
| <b>M</b>  | <b>1.00</b> | <b>1.15</b> |
| <b>SD</b> | <b>0.95</b> | <b>0.77</b> |
| <b>SE</b> | <b>0.29</b> | <b>0.23</b> |

| SSG       | pre         | post        |
|-----------|-------------|-------------|
| 9         | 0.43        | 1.07        |
| 8         | 1.22        | 2.14        |
| 1         | 1.01        | 0.79        |
| 3         | 1.52        | 1.81        |
| 4         | 0.37        | 0.23        |
| 7         | 0.89        | 1.89        |
| 5         | 1.78        | 0.55        |
| 10        | 1.99        | 1.52        |
| 2         | 0.57        | 0.43        |
| 6         | 0.22        | 0.10        |
| <b>M</b>  | <b>1.00</b> | <b>1.05</b> |
| <b>SD</b> | <b>0.62</b> | <b>0.74</b> |
| <b>SE</b> | <b>0.19</b> | <b>0.23</b> |

**COXV**

| CON       | pre         | post        |
|-----------|-------------|-------------|
| 25        | 0.82        | 1.35        |
| 23        | 1.35        | 1.59        |
| 27        | 1.59        | 0.51        |
| 22        | 1.06        | 0.48        |
| 32        | 0.84        | 0.86        |
| 28        | 0.41        | 0.57        |
| 26        | 1.03        | 0.58        |
| 24        | 0.87        | 0.67        |
| 31        | 1.04        | 1.16        |
| <b>M</b>  | <b>1.00</b> | <b>0.86</b> |
| <b>SD</b> | <b>0.34</b> | <b>0.41</b> |
| <b>SE</b> | <b>0.11</b> | <b>0.14</b> |

| CYC       | pre         | post        |
|-----------|-------------|-------------|
| 19        | 0.44        | 0.49        |
| 16        | 2.69        | 1.94        |
| 15        | 0.29        | 0.79        |
| 12        | 1.85        | 1.28        |
| 14        | 1.65        | 0.78        |
| 13        | 1.55        | 0.93        |
| 17        | 0.66        | 1.11        |
| 21        | 0.59        | 0.47        |
| 11        | 0.38        | 0.66        |
| 18        | 0.49        | 0.83        |
| 20        | 0.41        | 0.40        |
| <b>M</b>  | <b>1.00</b> | <b>0.88</b> |
| <b>SD</b> | <b>0.82</b> | <b>0.44</b> |
| <b>SE</b> | <b>0.25</b> | <b>0.13</b> |

| SSG       | pre         | post        |
|-----------|-------------|-------------|
| 9         | 0.62        | 1.31        |
| 8         | 1.42        | 1.98        |
| 1         | 0.67        | 0.46        |
| 3         | 1.24        | 1.03        |
| 4         | 0.50        | 0.28        |
| 7         | 1.04        | 2.40        |
| 5         | 1.39        | 0.87        |
| 10        | 1.84        | 1.24        |
| 2         | 0.93        | 0.47        |
| 6         | 0.34        | 0.30        |
| <b>M</b>  | <b>1.00</b> | <b>1.03</b> |
| <b>SD</b> | <b>0.47</b> | <b>0.72</b> |
| <b>SE</b> | <b>0.15</b> | <b>0.23</b> |

**SIRT1**

| CON       | pre         | post        |
|-----------|-------------|-------------|
| 25        | 0.62        | 0.62        |
| 23        | 1.18        | 0.61        |
| 27        | 0.58        | 0.41        |
| 22        | 0.15        | 0.23        |
| 32        | 0.95        | 0.65        |
| 28        | 0.86        | 1.37        |
| 26        | 1.89        | 1.80        |
| 24        | 1.58        | 4.37        |
| 31        | 1.18        | 1.09        |
| <b>M</b>  | <b>1.00</b> | <b>1.24</b> |
| <b>SD</b> | <b>0.53</b> | <b>1.27</b> |
| <b>SE</b> | <b>0.18</b> | <b>0.42</b> |

| CYC       | pre         | post        |
|-----------|-------------|-------------|
| 19        | 0.39        | 0.40        |
| 16        | 0.37        | 0.38        |
| 15        | 2.26        | 0.51        |
| 12        | 0.32        | 0.22        |
| 14        | 0.83        | 0.98        |
| 13        | 0.89        | 1.30        |
| 17        | 0.21        | 1.02        |
| 21        | 1.16        | 0.96        |
| 11        | 1.90        | 1.53        |
| 18        | 1.52        | 1.95        |
| 20        | 1.14        | 1.16        |
| <b>M</b>  | <b>1.00</b> | <b>0.95</b> |
| <b>SD</b> | <b>0.71</b> | <b>0.56</b> |
| <b>SE</b> | <b>0.22</b> | <b>0.17</b> |

| SSG       | pre         | post        |
|-----------|-------------|-------------|
| 9         | 0.90        | 0.98        |
| 8         | 0.29        | 0.48        |
| 1         | 0.52        | 1.47        |
| 3         | 0.36        | 0.69        |
| 4         | 0.86        | 0.57        |
| 7         | 2.72        | 2.56        |
| 5         | 0.58        | 0.69        |
| 10        | 0.36        | 0.47        |
| 2         | 2.33        | 2.19        |
| 6         | 1.08        | 0.32        |
| <b>M</b>  | <b>1.00</b> | <b>1.04</b> |
| <b>SD</b> | <b>0.85</b> | <b>0.78</b> |
| <b>SE</b> | <b>0.27</b> | <b>0.25</b> |

**p53**

| CON       | pre         | post        |
|-----------|-------------|-------------|
| 25        | 0.98        | 1.03        |
| 23        | 1.17        | 0.94        |
| 27        | 1.09        | 1.06        |
| 22        | 1.61        | 0.95        |
| 32        | 1.29        | 1.27        |
| 28        | 1.01        | 1.26        |
| 26        | 0.19        | 0.18        |
| 24        | 0.62        | 1.81        |
| 31        | 1.04        | 1.33        |
| <b>M</b>  | <b>1.00</b> | <b>1.09</b> |
| <b>SD</b> | <b>0.40</b> | <b>0.44</b> |
| <b>SE</b> | <b>0.13</b> | <b>0.15</b> |

| CYC       | pre         | post        |
|-----------|-------------|-------------|
| 19        | 1.13        | 1.32        |
| 16        | 1.06        | 0.96        |
| 15        | 1.12        | 1.40        |
| 12        | 1.14        | 0.72        |
| 14        | 1.66        | 2.09        |
| 13        | 0.37        | 0.89        |
| 17        | 1.28        | 1.00        |
| 21        | 1.28        | 1.08        |
| 11        | 0.22        | 0.26        |
| 18        | 0.25        | 0.13        |
| 20        | 1.48        | 1.67        |
| <b>M</b>  | <b>1.00</b> | <b>1.05</b> |
| <b>SD</b> | <b>0.49</b> | <b>0.56</b> |
| <b>SE</b> | <b>0.15</b> | <b>0.17</b> |

| SSG       | pre         | post        |
|-----------|-------------|-------------|
| 9         | 1.44        | 1.26        |
| 8         | 1.25        | 1.16        |
| 1         | 1.19        | 1.15        |
| 3         | 1.07        | 1.11        |
| 4         | 1.21        | 1.30        |
| 7         | 0.81        | 2.32        |
| 5         | 1.61        | 1.49        |
| 10        | 0.64        | 1.41        |
| 2         | 0.12        | 0.30        |
| 6         | 0.65        | 1.03        |
| <b>M</b>  | <b>1.00</b> | <b>1.25</b> |
| <b>SD</b> | <b>0.44</b> | <b>0.50</b> |
| <b>SE</b> | <b>0.14</b> | <b>0.16</b> |

**AKT**

| CON       | pre         | post        |
|-----------|-------------|-------------|
| 25        | 0.33        | 1.32        |
| 23        | 1.03        | 0.64        |
| 27        | 0.86        | 0.55        |
| 22        | 0.20        | 0.13        |
| 32        | 2.38        | 0.55        |
| 28        | 0.28        | 0.35        |
| 26        | 1.97        | 1.01        |
| 24        | 1.11        | 0.66        |
| 31        | 0.85        | 1.36        |
| <b>M</b>  | <b>1.00</b> | <b>0.73</b> |
| <b>SD</b> | <b>0.75</b> | <b>0.42</b> |
| <b>SE</b> | <b>0.25</b> | <b>0.14</b> |

| CYC       | pre         | post        |
|-----------|-------------|-------------|
| 19        | 0.47        | 0.95        |
| 16        | 1.20        | 1.12        |
| 15        | 0.21        | 0.40        |
| 12        | 0.48        | 0.30        |
| 14        | 2.47        | 0.75        |
| 13        | 0.84        | 1.61        |
| 17        | 0.23        | 0.68        |
| 21        | 0.56        | 0.40        |
| 11        | 1.29        | 2.43        |
| 18        | 2.24        | 1.73        |
| 20        | 1.01        | 1.18        |
| <b>M</b>  | <b>1.00</b> | <b>1.05</b> |
| <b>SD</b> | <b>0.80</b> | <b>0.69</b> |
| <b>SE</b> | <b>0.24</b> | <b>0.21</b> |

| SSG       | pre         | post        |
|-----------|-------------|-------------|
| 9         | 0.63        | 1.30        |
| 8         | 0.72        | 1.13        |
| 1         | 0.36        | 0.20        |
| 3         | 0.12        | 0.06        |
| 4         | 4.19        | 1.26        |
| 7         | 0.62        | 2.92        |
| 5         | 0.32        | 0.18        |
| 10        | 0.14        | 0.12        |
| 2         | 2.19        | 2.45        |
| 6         | 0.71        | 0.45        |
| <b>M</b>  | <b>1.00</b> | <b>1.01</b> |
| <b>SD</b> | <b>1.26</b> | <b>1.01</b> |
| <b>SE</b> | <b>0.40</b> | <b>0.32</b> |

**PGC-1 $\alpha$** 

| CON       | pre         | post        |
|-----------|-------------|-------------|
| 25        | 1.00        | 1.10        |
| 23        | 0.97        | 1.08        |
| 27        | 0.98        | 0.62        |
| 22        | 0.32        | 0.53        |
| 32        | 1.09        | 1.73        |
| 28        | 1.97        | 1.59        |
| 26        | 0.66        | 0.86        |
| 24        | 0.72        | 0.65        |
| 31        | 1.29        | 0.59        |
| <b>M</b>  | <b>1.00</b> | <b>0.97</b> |
| <b>SD</b> | <b>0.46</b> | <b>0.44</b> |
| <b>SE</b> | <b>0.15</b> | <b>0.15</b> |

| CYC       | pre         | post        |
|-----------|-------------|-------------|
| BRJO      | 1.18        | 0.94        |
| DALI      | 0.99        | 1.79        |
| PAJE      | 0.61        | 0.70        |
| DANE      | 0.82        | 0.61        |
| PEIV      | 1.00        | 1.11        |
| JAHO      | 1.24        | 0.76        |
| RABL      | 1.15        | 1.31        |
| ROPO      | 1.22        | 1.07        |
| CHCO      | 1.04        | 0.47        |
| BRLE      | 0.71        | 0.26        |
| ADYA      | 1.05        | 1.30        |
| <b>M</b>  | <b>1.00</b> | <b>0.94</b> |
| <b>SD</b> | <b>0.22</b> | <b>0.44</b> |
| <b>SE</b> | <b>0.07</b> | <b>0.13</b> |

| SSG       | pre         | post        |
|-----------|-------------|-------------|
| 9         | 1.63        | 1.28        |
| 8         | 0.95        | 1.96        |
| 1         | 0.88        | 0.87        |
| 3         | 1.29        | 1.94        |
| 4         | 0.92        | 0.61        |
| 7         | 1.23        | 1.11        |
| 5         | 1.05        | 1.17        |
| 10        | 1.23        | 0.75        |
| 2         | 0.54        | 0.50        |
| 6         | 0.28        | 1.91        |
| <b>M</b>  | <b>1.00</b> | <b>1.21</b> |
| <b>SD</b> | <b>0.39</b> | <b>0.56</b> |
| <b>SE</b> | <b>0.12</b> | <b>0.18</b> |

**GLUT4**

| CON       | pre         | post        |
|-----------|-------------|-------------|
| 25        | 1.09        | 0.98        |
| 23        | 1.05        | 0.89        |
| 27        | 0.63        | 0.71        |
| 22        | 0.59        | 0.69        |
| 32        | 0.75        | 0.48        |
| 28        | 0.40        | 0.72        |
| 26        | 2.37        | 1.85        |
| 24        | 1.72        | 1.37        |
| 31        | 0.39        | 0.55        |
| <b>M</b>  | <b>1.00</b> | <b>0.91</b> |
| <b>SD</b> | <b>0.66</b> | <b>0.44</b> |
| <b>SE</b> | <b>0.22</b> | <b>0.15</b> |

| CYC       | pre         | post        |
|-----------|-------------|-------------|
| 19        | 0.85        | 0.90        |
| 16        | 0.94        | 0.89        |
| 15        | 0.68        | 0.57        |
| 12        | 0.45        | 0.45        |
| 14        | 0.74        | 0.69        |
| 13        | 0.62        | 0.62        |
| 17        | 0.97        | 0.55        |
| 21        | 0.72        | 0.62        |
| 11        | 1.76        | 1.72        |
| 18        | 1.61        | 1.26        |
| 20        | 1.67        | 1.87        |
| <b>M</b>  | <b>1.00</b> | <b>0.92</b> |
| <b>SD</b> | <b>0.43</b> | <b>0.39</b> |
| <b>SE</b> | <b>0.13</b> | <b>0.12</b> |

| SSG       | pre         | post        |
|-----------|-------------|-------------|
| 9         | 1.15        | 1.12        |
| 8         | 1.23        | 1.34        |
| 1         | 0.75        | 0.63        |
| 3         | 1.16        | 1.06        |
| 4         | 0.62        | 0.66        |
| 7         | 0.82        | 1.29        |
| 5         | 0.84        | 0.91        |
| 10        | 0.52        | 0.71        |
| 2         | 1.50        | 1.50        |
| 6         | 1.40        | 3.99        |
| <b>M</b>  | <b>1.00</b> | <b>1.32</b> |
| <b>SD</b> | <b>0.33</b> | <b>0.99</b> |
| <b>SE</b> | <b>0.11</b> | <b>0.31</b> |
